# Supplementary material for: Exploring the Efficacy and Potential of Large Language Models for Depression: A Systematic Review
Source: bioRxiv or medRxiv preprint supplement (doi:10.1101/2024.05.07.24306897), 2024-05-07
Supplement: Supplementary file [file media-1.pdf]

## Tables.

**Table 1: Summary of included studies**

| Author (Ref)                | Year | Sample Size & Data Type            | Task Type                     | Specific Task                                        | Summary of Key Results                                                             |
|-----------------------------|------|------------------------------------|-------------------------------|------------------------------------------------------|------------------------------------------------------------------------------------|
| <b>Bokolo et al. (31)</b>   | 2023 | 632,000 tweets                     | Detection                     | Depression detection from Twitter                    | RoBERTa achieved high accuracy; transformer models outperformed ML models.         |
| <b>Lau et al. (26)</b>      | 2023 | 189 clinical interview transcripts | Classification                | Depression severity assessment                       | Prefix-tuned LLMs outperformed traditional models with lower error rates.          |
| <b>Dai et al. (32)</b>      | 2021 | 500 EHRs                           | Classification                | Psychiatric patient screening                        | Transfer learning models like DistilBERT and RoBERTa improved performance.         |
| <b>Heston et al. (51)</b>   | 2023 | 25 conversational agents           | Detection and Management      | Depression and suicidality detection                 | Agents recommended intervention late; delayed suicide hotline reference.           |
| <b>Senn et al. (40)</b>     | 2022 | 189 clinical interviews            | Classification                | Depression classification from interviews            | BERT ensembles showed robustness and higher F1 scores.                             |
| <b>Levkovich et al. (7)</b> | 2023 | 8 vignettes                        | Classification and Management | Treatment strategy assessment                        | ChatGPT aligned with treatment guidelines, differing from primary care physicians. |
| <b>Perlis et al. (29)</b>   | 2024 | 50 clinical vignettes              | Management                    | Bipolar depression management                        | Augmented LLMs matched expert treatment choices better than non-augmented models.  |
| <b>Sezgin et al. (28)</b>   | 2023 | 14 PPD questions                   | Management                    | Postpartum depression information quality assessment | ChatGPT provided more clinically accurate responses than other models.             |

|                             |      |                                       |                               |                                                           |                                                                           |
|-----------------------------|------|---------------------------------------|-------------------------------|-----------------------------------------------------------|---------------------------------------------------------------------------|
| <b>Wan et al. (44)</b>      | 2022 | 12,006 admission notes                | Classification                | Family history identification in mood disorders           | BERT–CNN model achieved high accuracy in family history extraction.       |
| <b>Owen et al. (39)</b>     | 2023 | Reddit datasets                       | Detection                     | Depression signal detection in Reddit posts               | BERT and MentalBERT showed significant early detection ability.           |
| <b>Wang et al. (35)</b>     | 2020 | 13,993 microblogs                     | Classification                | Depression risk prediction from Weibo posts               | BERT achieved the highest micro-averaged F1 score.                        |
| <b>Elyosehp et al. (3)</b>  | 2024 | Case vignettes                        | Classification and Management | Depression prognosis assessment                           | LLMs closely aligned with human professionals in prognosis.               |
| <b>Hond et al. (50)</b>     | 2024 | 16,159 cancer patients' EHR data      | Detection                     | Early depression risk detection in cancer patients        | Structured EHR data used alone yielded the best prediction results.       |
| <b>Danner et al. (25)</b>   | 2023 | DAIC-WOZ datasets                     | Detection                     | Depression detection from interviews                      | Models achieved superior performance, significantly outperforming others. |
| <b>Farruque et al. (36)</b> | 2024 | 6077 tweets and 1500 annotated tweets | Detection and Classification  | Depression symptoms modelling from Twitter                | Iterative LLM training improved accuracy in depression detection.         |
| <b>Lu et al. (34)</b>       | 2023 | DAIC dataset                          | Detection                     | Depression detection via conversation turn classification | Deep learning framework achieved a high F1-score.                         |
| <b>Lam et al. (30)</b>      | 2019 | 189 DAIC-WOZ participants             | Detection                     | Multi-modal depression detection                          | Multi-modal model outperformed single-modality in F1 score.               |

|                                  |      |                                            |                              |                                                       |                                                                       |
|----------------------------------|------|--------------------------------------------|------------------------------|-------------------------------------------------------|-----------------------------------------------------------------------|
| <b>Llias et al. (27)</b>         | 2023 | Public datasets                            | Detection                    | Stress and depression identification in social media  | Enhanced performance with multimodal adaptation gates.                |
| <b>Toto et al. (24)</b>          | 2021 | 189 clinical interviews                    | Detection                    | Depression screening using audio and text             | AudiBERT significantly improved classification with high F1 scores.   |
| <b>Sadeghi et al. (41)</b>       | 2023 | 275 interview transcripts                  | Detection                    | Depression severity prediction from text              | Fine-tuned GPT-3.5-Turbo showed robust accuracy.                      |
| <b>Kabir et al. (37)</b>         | 2023 | 40,191 tweets                              | Detection and Classification | Depression severity detection from tweets             | Attention-based models classified tweets with high confidence scores. |
| <b>Suri et al. (43)</b>          | 2022 | 5997 tweets                                | Detection                    | Depressive tendencies detection using multimodal data | Cross-modal attention-based BERT model showed high F1 scores.         |
| <b>Abilkaiyrkyzy et al. (38)</b> | 2024 | 219 E-DAIC participants                    | Detection and Management     | Mental illness detection using a chatbot              | Chatbot achieved 69% accuracy and high usability.                     |
| <b>Pourkeyvan et al. (42)</b>    | 2024 | 11,890,632 tweets and 553 bio-descriptions | Detection                    | Mental health disorder prediction from Twitter        | Hugging Face BERT models significantly improved prediction accuracy.  |
| <b>Tey et al. (49)</b>           | 2023 | Over 3.5 million tweets                    | Detection and Classification | Pre- and post-depressive detection from tweets        | BERT with emoji decoding accurately classified depressive categories. |
| <b>Farruque et al. (33)</b>      | 2022 | 13,387 Reddit samples                      | Detection and Classification | Depression level detection modelling                  | MBERT improved classification, especially for longer posts.           |
| <b>Janatdoust et al. (46)</b>    | 2022 | 16,632 social media comments               | Detection and Classification | Depression signs detection from social media text     | BERT-based ensembles demonstrated superior classification accuracy.   |

|                                      |      |                        |                              |                                                            |                                                                         |
|--------------------------------------|------|------------------------|------------------------------|------------------------------------------------------------|-------------------------------------------------------------------------|
| <b>Adarsh S et al. (54)</b>          | 2022 | Social media texts     | Detection and Classification | Depression sign detection using BERT                       | Fine-tuned BERT model showed specificity in detection improvement.      |
| <b>Sivamanikandan S. et al. (52)</b> | 2022 | Social media posts     | Detection and Classification | Depression level classification                            | RoBERTa achieved best performance among the tested transformer models.  |
| <b>Esackimuthu et al. (53)</b>       | 2022 | ALBERT base v1 data    | Detection and Classification | Depression detection from social media text                | ALBERT model showed potential despite challenges with data quality.     |
| <b>Singh et al. (45)</b>             | 2022 | Ensemble of models     | Detection and Classification | Depression level classification using BERT, RoBERTa, XLNet | Ensemble ranked 3rd, indicating effective detection and classification. |
| <b>Poświata et al. (48)</b>          | 2022 | RoBERTa models' data   | Detection and Classification | Depression sign detection using RoBERTa                    | Ensemble achieved high performance metrics in competitive setting.      |
| <b>Hegde et al. (47)</b>             | 2022 | Social media text data | Detection and Classification | Depression detection using supervised learning             | BERT-based TL model performed better than ML classifiers.               |

**Abbreviations:** Ref: Reference | EHR: Electronic Health Record | LLM: Large Language Model | NLP: Natural Language Processing | PHQ-8: Patient Health Questionnaire-8 | DAIC-WOZ: Distress Analysis Interview Corpus - Wizard of Oz | CNN: Convolutional Neural Network | BERT: Bidirectional Encoder Representations from Transformers | AUROC: Area Under the Receiver Operating Characteristic Curve | ZSL: Zero-Shot Learning | TL: Transfer Learning | MLP: Multi-Layer Perceptron | ACOG: American College of Obstetricians and Gynecologists | DSM-5: Diagnostic and Statistical Manual of Mental Disorders, Fifth Edition | SVM: Support Vector Machine | BiLSTM: Bidirectional Long Short-Term Memory | ROC AUC: Receiver Operating Characteristic Area Under the Curve.

**Table 2: Summary of conclusions and limitations of included studies**

| Author                      | Model                             | Task Type                     | Conclusion Summary                                                                                                        | Limitations Summary                                                                                                |
|-----------------------------|-----------------------------------|-------------------------------|---------------------------------------------------------------------------------------------------------------------------|--------------------------------------------------------------------------------------------------------------------|
| <b>Bokolo et al. (31)</b>   | RoBERTa, DeBERTa                  | Detection                     | Transformer models like RoBERTa excel in depression detection from Twitter data, outperforming traditional ML approaches. | Dataset not initially intended for depression detection, lacks demographic and linguistic diversity.               |
| <b>Lau et al. (26)</b>      | Prefix-tuned LLM                  | Classification                | LLMs with prefix-tuning significantly enhance depression severity assessment, surpassing traditional methods.             | Challenges include potential overfitting, limited training data, and lack of generalizability.                     |
| <b>Dai et al. (32)</b>      | BERT, DistilBERT, ALBERT, ROBERTa | Classification                | BERT models, especially with feature dependency, effectively classify psychiatric conditions from EHRs.                   | Highly imbalanced dataset and overlapping psychiatric symptoms complicate accurate classification.                 |
| <b>Heston et al. (51)</b>   | GPT-3.5                           | Detection and Management      | Conversational agents show delayed response in escalating mental health risks, needing more rigorous testing.             | Limited by the use of publicly available agents and structured prompts, lacking real-world interaction complexity. |
| <b>Senn et al. (40)</b>     | BERT, RoBERTa, DistilBERT         | Classification                | Ensembles of BERT models enhance depression detection robustness in clinical interviews.                                  | Small dataset size and reliance solely on transcript data limit effectiveness.                                     |
| <b>Levkovich et al. (7)</b> | GPT-3.5 and GPT-4                 | Classification and Management | ChatGPT models align with treatment guidelines better than primary care physicians in hypothetical scenarios.             | Study based on vignettes may not accurately reflect real patient interactions.                                     |
| <b>Perlis et al. (29)</b>   | GPT-4                             | Management                    | Augmented GPT-4 aids in clinical decision support for bipolar disorder, outperforming non-augmented models.               | Limited by the narrow scope of clinical vignettes used, questioning the generalization of findings.                |
| <b>Sezgin et al. (28)</b>   | GPT-4, LaMDA                      | Management                    | GPT-4 provides more accurate responses to postpartum depression queries than other models and traditional searches.       | Reliance on a limited set of standardized questions and the non-medical focus of LLM design limit applicability.   |

|                             |                                   |                               |                                                                                                                             |                                                                                                                    |
|-----------------------------|-----------------------------------|-------------------------------|-----------------------------------------------------------------------------------------------------------------------------|--------------------------------------------------------------------------------------------------------------------|
| <b>Wan et al. (44)</b>      | BERT–CNN                          | Classification                | High accuracy in identifying family psychiatric history from EHRs, suggesting utility in understanding mood disorders.      | Study's applicability is limited to a single hospital's dataset, possibly not generalizable.                       |
| <b>Owen et al. (39)</b>     | BERT, MentalBERT                  | Detection                     | Effective identification of depressive signals in online forums, with potential for early intervention.                     | Challenges in determining exact timing of posts and interpreting informal internet communication.                  |
| <b>Wang et al. (35)</b>     | BERT, RoBERTa, XLNET              | Classification                | Deep learning methods, enhanced by domain-specific pretraining, effectively detect depression risk levels from microblogs.  | Data imbalance and semantic ambiguities in microblogs complicate accurate depression risk classification.          |
| <b>Elyosehp et al. (3)</b>  | GPT-3.5, GPT-4, Claude, Bard      | Classification and Management | LLMs match or surpass professional judgments in prognosis accuracy, showing potential for clinical integration.             | Vignette-based methodology limits real-world applicability; further validation with actual patient data is needed. |
| <b>Hond et al. (50)</b>     | BERT                              | Detection                     | Machine learning models predict depression risk in cancer patients using EHRs, with structured data models performing best. | Bias in model calibration and reliance on structured data might miss unrecorded symptoms.                          |
| <b>Danner et al. (25)</b>   | BERT-based models, GPT-3.5, GPT-4 | Detection                     | Advanced transformer networks significantly enhance depression detection from clinical interview data.                      | Ethical, legal, and privacy concerns need addressing; further validation required.                                 |
| <b>Farruque et al. (36)</b> | BERT, Mental-BERT                 | Detection and Classification  | Semi-supervised learning models, iteratively refined with Twitter data, improve depression symptom detection accuracy.      | Limited dataset size and absence of continuous human annotation during model training may affect reliability.      |
| <b>Lu et al. (34)</b>       | BERT, transformer encoder         | Detection                     | Novel deep learning framework enhances depression detection from psychiatric interview data, improving interpretability.    | Study limited to transcribed data, which may not capture all nuances of psychiatric assessments.                   |
| <b>Lam et al. (30)</b>      | Transformer, 1D CNN               | Detection                     | Multi-modal models combining text and audio data effectively detect depression, enhanced by data augmentation.              | Limited generalizability due to dataset specificity and potential biases in class distribution.                    |

|                                  |                                        |                              |                                                                                                                             |                                                                                                                     |
|----------------------------------|----------------------------------------|------------------------------|-----------------------------------------------------------------------------------------------------------------------------|---------------------------------------------------------------------------------------------------------------------|
| <b>Llias et al. (27)</b>         | BERT, MentalBERT                       | Detection                    | Extra-linguistic features improve calibration and performance of models in detecting stress and depression from texts.      | Constraints in GPU resources, lack of explainability, and reliance on single model runs limit robustness.           |
| <b>Toto et al. (24)</b>          | AudiBERT                               | Detection                    | AudiBERT outperforms traditional and hybrid models in depression screening, utilizing multimodal data.                      | Emotional expression variability and privacy concerns during data collection impact model training and performance. |
| <b>Sadeghi et al. (41)</b>       | GPT-3.5-Turbo, DepRoBERTa              | Detection                    | Language models effectively predict depression severity from textual data, enhancing diagnostic procedures.                 | Limited dataset size impacts generalizability of findings.                                                          |
| <b>Kabir et al. (37)</b>         | BERT, DistilBERT                       | Detection and Classification | Models effectively classify social media texts into depression severity categories, with high confidence and accuracy.      | Annotation biases and lack of contextual understanding in social media texts pose significant challenges.           |
| <b>Suri et al. (43)</b>          | BERT                                   | Detection                    | Multimodal BERT frameworks significantly enhance detection of depressive tendencies from complex social media data.         | Data biases and model applicability to less active or non-openly expressive users are noted concerns.               |
| <b>Abilkaiyrkyzy et al. (38)</b> | BERT                                   | Detection and Management     | Chatbot effectively detects and classifies mental health issues, highly usable for reducing barriers to mental health care. | Chatbot's limited emotional detection capabilities and dataset specificity restrict broader applicability.          |
| <b>Pourkeyvan et al. (42)</b>    | BERT models from Hugging Face          | Detection                    | Superior detection of depression symptoms from social media, demonstrating the efficacy of advanced NLP models.             | Analysis limited to English-language tweets, not representing non-English speaking populations.                     |
| <b>Tey et al. (49)</b>           | BERT, supplemented with emoji decoding | Detection and Classification | Augmented BERT model classifies Twitter users into depressive categories, enhancing early depression detection.             | Reliance on self-reported diagnosis and English-only analysis limits generalizability.                              |

|                                      |                                               |                              |                                                                                                                                    |                                                                                                                 |
|--------------------------------------|-----------------------------------------------|------------------------------|------------------------------------------------------------------------------------------------------------------------------------|-----------------------------------------------------------------------------------------------------------------|
| <b>Farruque et al. (33)</b>          | Mental BERT (MBERT)                           | Detection and Classification | MBERT enhanced with text excerpts significantly improves depression level classification from social media posts.                  | High computational demands for excerpt extraction limit practical application in time-sensitive environments.   |
| <b>Janatdoust et al. (46)</b>        | Ensemble of BERT, ALBERT, DistilBERT, RoBERTa | Detection and Classification | Ensemble models effectively classify depression signs from social media, utilizing multiple language models for improved accuracy. | Training based on predefined criteria may not accurately reflect complex depressive symptoms.                   |
| <b>Adarsh S et al. (54)</b>          | BERT-small                                    | Detection and Classification | Enhanced BERT model accurately classifies depression severity from social media texts, understanding nuances better than others.   | Natural language variability and contextual depth of posts, alongside imbalanced data classes, pose challenges. |
| <b>Sivamanikandan S. et al. (52)</b> | DistilBERT, RoBERTa, ALBERT                   | Detection and Classification | Transformer models classify depression levels effectively, with RoBERTa achieving the best performance.                            | Dataset imbalance and lack of clinical validation limit the generalization of findings.                         |
| <b>Esackimuthu et al. (53)</b>       | ALBERT base v1                                | Detection and Classification | ALBERT shows potential in detecting depression signs from social media texts but faces challenges due to complex human emotions.   | Limited by the quality of social media data and subtle nature of human emotions.                                |
| <b>Singh et al. (45)</b>             | Ensemble of BERT, RoBERTa, XLNet              | Detection and Classification | Ensemble model accurately classifies depression levels from social media text, ranking highly in competitive settings.             | Reliance on social media text and absence of real-world clinical validation pose significant challenges.        |
| <b>Poświata et al. (48)</b>          | RoBERTa, DepRoBERTa                           | Detection and Classification | RoBERTa and DepRoBERTa ensemble excels in classifying depression signs, securing top performance in a competitive environment.     | Limited by dataset specifics and the competitive model training environment.                                    |



---

|                          |                                  |                              |                                                                                                                            |                                                                                                          |
|--------------------------|----------------------------------|------------------------------|----------------------------------------------------------------------------------------------------------------------------|----------------------------------------------------------------------------------------------------------|
| <b>Hegde et al. (47)</b> | Ensemble of ML classifiers, BERT | Detection and Classification | BERT-based Transfer Learning model outperforms traditional ML classifiers in detecting depression from social media texts. | Challenges include handling the natural language variability and contextual depth of social media posts. |
|--------------------------|----------------------------------|------------------------------|----------------------------------------------------------------------------------------------------------------------------|----------------------------------------------------------------------------------------------------------|

---

**Abbreviations:** BERT: Bidirectional Encoder Representations from Transformers | CNN: Convolutional Neural Network | GPT: Generative Pre-trained Transformer | LLM: Large Language Model | MLP: Multi-Layer Perceptron | NLP: Natural Language Processing | PHQ-8: Patient Health Questionnaire-8 | PHQ-9: Patient Health Questionnaire-9 | TL: Transfer Learning | ZSL: Zero-Shot Learning.
